# Supplementary material for: Cas9-targeted nanopore sequencing reveals epigenetic heterogeneity after de novo assembly of native full-length hepatitis B virus genomes
Source: PubMed Central journal article supplement (PMC8209722; doi:10.1099/mgen.0.000507), 2021-05-18
Supplement: mgen-7-0507-s001.pdf [file mgen-7-0507-s001.pdf]

**A**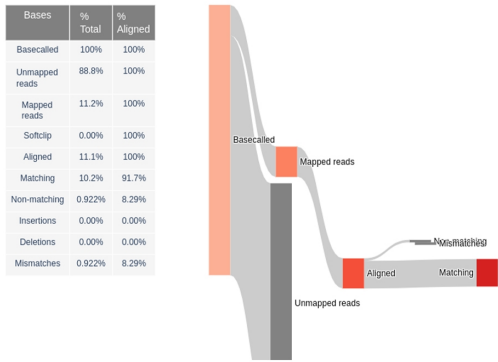**B**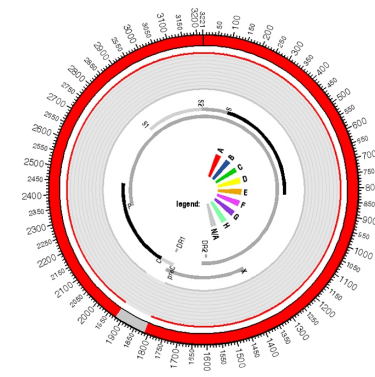**C**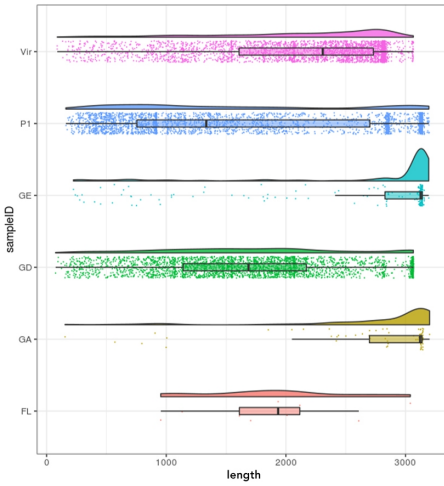**D**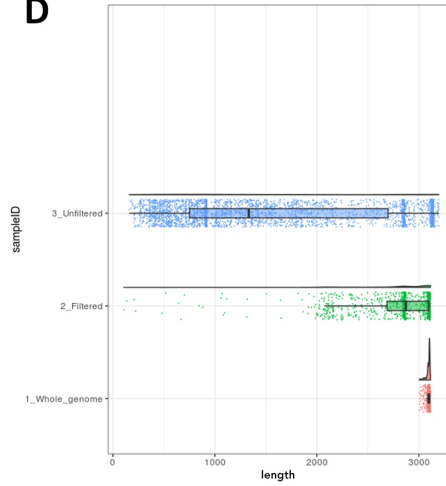**E**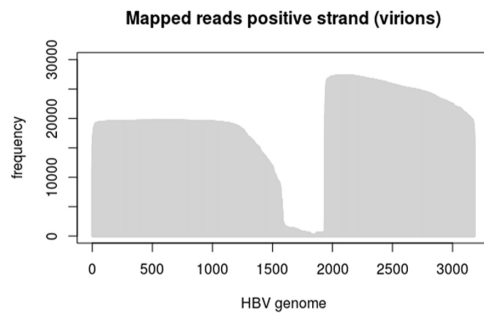**F**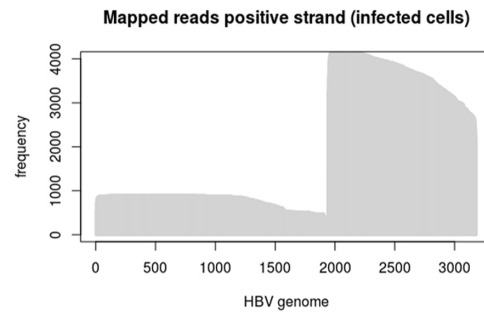**G**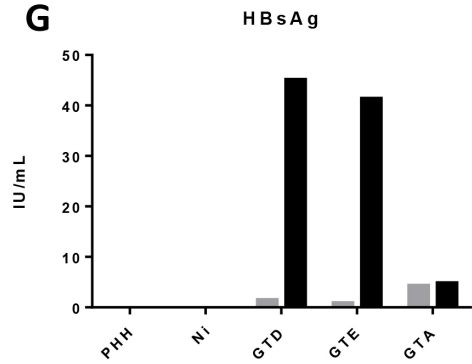**H**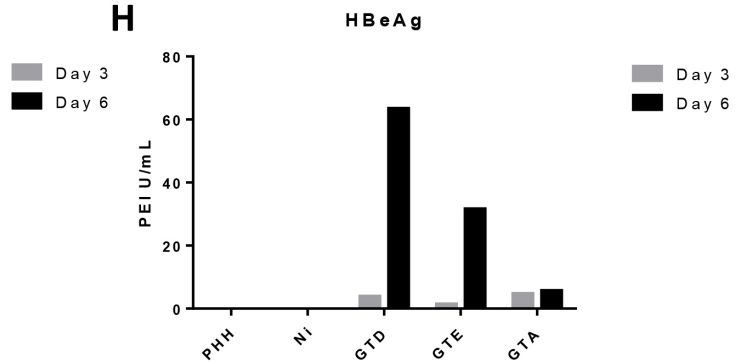

**Supplementary figure 1. A** Yield for aligned reads calculated with pycoQC (representative sample). B: HBV genotype was determined by jumping profile Hidden Markov Model (jpHMM). C: Plot of total read length prior to filtering out short reads for all samples; HBV virions (Vir), patient enriched HBV (P1), HBV from infected PHH (GA, GD and GE) and HBV sequenced on Flongles (FL). D: plot depicting read length after each filtering stage, unfiltered = no filtering applied, filtered = removal of reads less than 2KB, whole genome = removal of all reads less than 3KB. E-F: Coverage of HBV virions and HBV isolated from infected PHH against adjusted reference genome starting at ECOR1 restriction site. G-H: Infection efficacy for HBV genotypes. PHH were infected with 100MOI of HBV geotype A, E or D. Serum levels of HBsAg, HBeAg were quantified by ELISA and HBV DNA was quantified by qPCR after 0, 3 and 6 days post infection. PHH = negative control, uninfected PHH only, Ni = negative control, uninfected PHH treated with PEG.

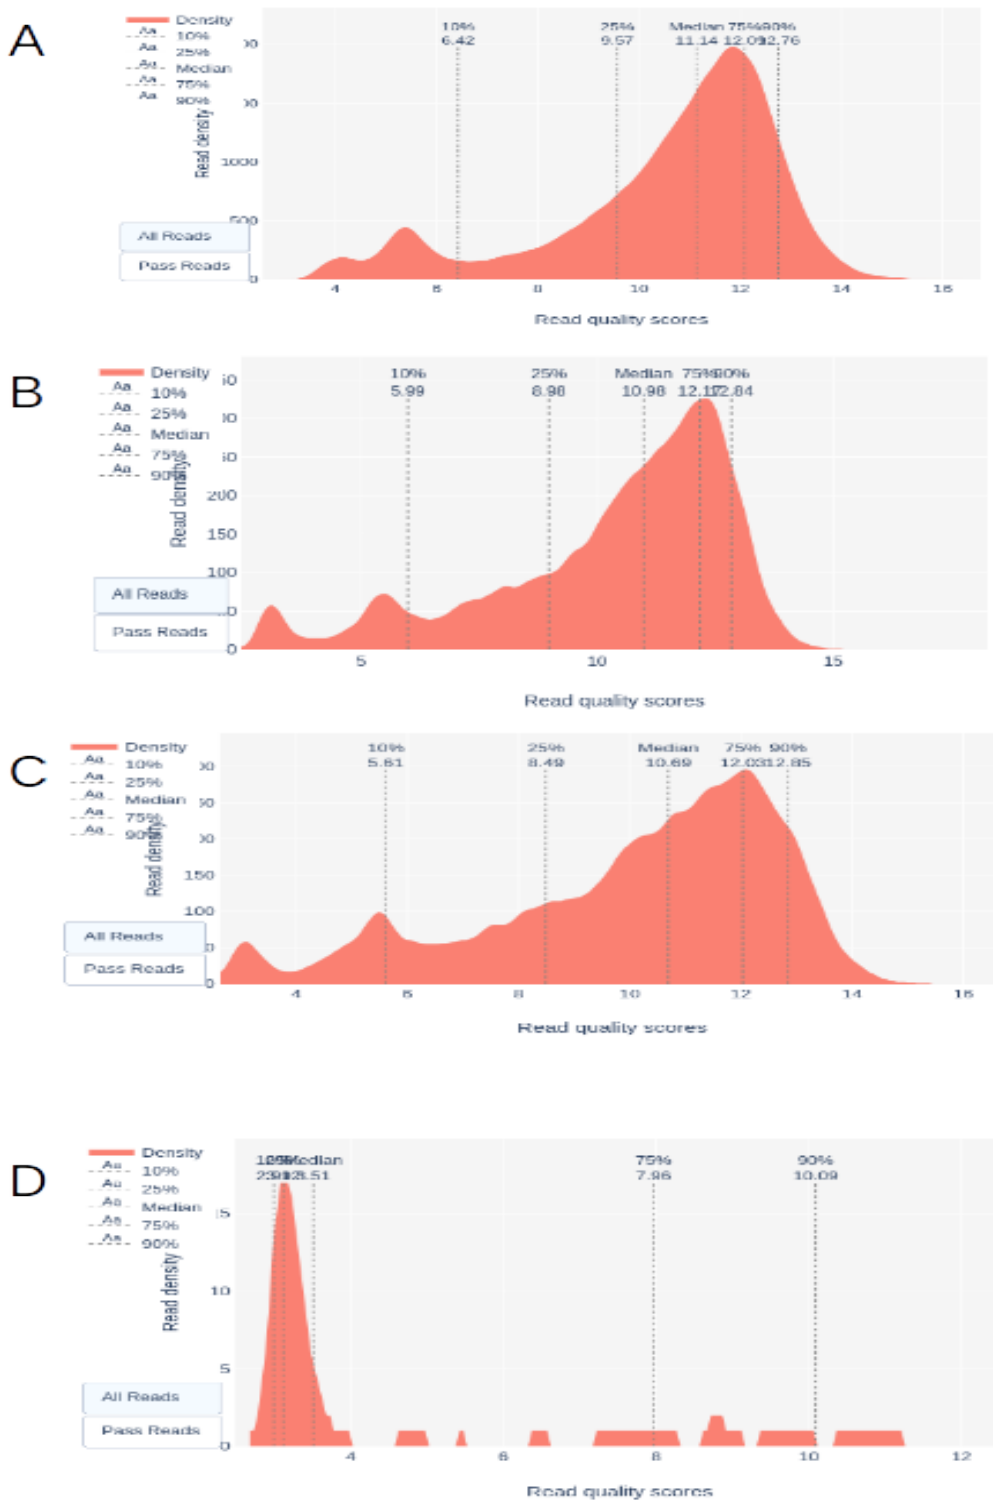

**Supplementary figure 2.** PHRED scores for nanopore runs. A: Genotype A sequenced on MinION, B: Genotype D sequenced on MinION, C: Genotype E sequenced on MinION, D: Genotype D sequenced on Flongle.

**Supplementary table 1.** Sequencing depth for effective calculation of HBV 5mCpG levels: p-value table corresponding to figure 1B.

| coverage | Group 1  | Group 2   | statistic | p        | padj      | p.adj.sig<br>nificant |
|----------|----------|-----------|-----------|----------|-----------|-----------------------|
| 10x      | 0% Meth  | 25% Meth  | 527.5     | 2.05E-12 | 8.2E-11   | ****                  |
| 10x      | 0% Meth  | 50% Meth  | 392       | 1.44E-14 | 5.76E-13  | ****                  |
| 10x      | 0% Meth  | 75% Meth  | 103       | 3.21E-20 | 1.284E-18 | ****                  |
| 10x      | 0% Meth  | 100% Meth | 69        | 7.03E-23 | 2.812E-21 | ****                  |
| 10x      | 25% Meth | 50% Meth  | 1391.5    | 0.043    | 1         | ns                    |
| 10x      | 25% Meth | 75% Meth  | 485.5     | 4.59E-12 | 1.836E-10 | ****                  |
| 10x      | 25% Meth | 100% Meth | 168       | 2.41E-19 | 9.64E-18  | ****                  |
| 10x      | 50% Meth | 75% Meth  | 647.5     | 2.13E-09 | 8.52E-08  | ****                  |
| 10x      | 50% Meth | 100% Meth | 272       | 2.94E-17 | 1.176E-15 | ****                  |
| 10x      | 75% Meth | 100% Meth | 342       | 5.43E-16 | 2.172E-14 | ****                  |
| 40x      | 0% Meth  | 25% Meth  | 193       | 2.06E-17 | 8.24E-16  | ****                  |
| 40x      | 0% Meth  | 50% Meth  | 127.5     | 1.42E-18 | 5.68E-17  | ****                  |
| 40x      | 0% Meth  | 75% Meth  | 58        | 3.38E-20 | 1.352E-18 | ****                  |
| 40x      | 0% Meth  | 100% Meth | 1.5       | 7.56E-22 | 3.024E-20 | ****                  |
| 40x      | 25% Meth | 50% Meth  | 1148      | 0.00095  | 0.038     | *                     |
| 40x      | 25% Meth | 75% Meth  | 223       | 1.27E-16 | 5.08E-15  | ****                  |
| 40x      | 25% Meth | 100% Meth | 55.5      | 2.2E-20  | 8.8E-19   | ****                  |
| 40x      | 50% Meth | 75% Meth  | 335       | 2.4E-14  | 9.6E-13   | ****                  |
| 40x      | 50% Meth | 100% Meth | 104       | 3.29E-19 | 1.316E-17 | ****                  |
| 40x      | 75% Meth | 100% Meth | 180       | 7.93E-18 | 3.172E-16 | ****                  |
| 100x     | 0% Meth  | 25% Meth  | 306.5     | 6.15E-15 | 2.46E-13  | ****                  |
| 100x     | 0% Meth  | 50% Meth  | 80        | 3.13E-19 | 1.252E-17 | ****                  |
| 100x     | 0% Meth  | 75% Meth  | 60        | 7.82E-20 | 3.128E-18 | ****                  |
| 100x     | 0% Meth  | 100% Meth | 8         | 4.73E-21 | 1.892E-19 | ****                  |
| 100x     | 25% Meth | 50% Meth  | 352.5     | 5.01E-14 | 2.004E-12 | ****                  |
| 100x     | 25% Meth | 75% Meth  | 82        | 1.96E-19 | 7.84E-18  | ****                  |
| 100x     | 25% Meth | 100% Meth | 8         | 4.29E-21 | 1.716E-19 | ****                  |
| 100x     | 50% Meth | 75% Meth  | 340       | 2.99E-14 | 1.196E-12 | ****                  |
| 100x     | 50% Meth | 100% Meth | 33.5      | 2.27E-20 | 9.08E-19  | ****                  |
| 100x     | 75% Meth | 100% Meth | 139.5     | 2.39E-18 | 9.56E-17  | ****                  |
| 1000x    | 0% Meth  | 25% Meth  | 41.5      | 4.12E-20 | 1.648E-18 | ****                  |
| 1000x    | 0% Meth  | 50% Meth  | 1         | 7.94E-21 | 3.176E-19 | ****                  |
| 1000x    | 0% Meth  | 75% Meth  | 0         | 5.18E-21 | 2.072E-19 | ****                  |
| 1000x    | 0% Meth  | 100% Meth | 0         | 5.15E-21 | 2.06E-19  | ****                  |
| 1000x    | 25% Meth | 50% Meth  | 232       | 3.03E-16 | 1.212E-14 | ****                  |
| 1000x    | 25% Meth | 75% Meth  | 68        | 1.01E-19 | 4.04E-18  | ****                  |
| 1000x    | 25% Meth | 100% Meth | 4         | 4.31E-21 | 1.724E-19 | ****                  |
| 1000x    | 50% Meth | 75% Meth  | 244       | 5.14E-16 | 2.056E-14 | ****                  |
| 1000x    | 50% Meth | 100% Meth | 18.5      | 1.31E-20 | 5.24E-19  | ****                  |
| 1000x    | 75% Meth | 100% Meth | 93.5      | 3.4E-19  | 1.36E-17  | ****                  |

**Supplementary table 2.** Primer sequences for BS-qMSP of HBV.

| NAME    | SEQUENCE (5' > 3')<br>5-139 bases according to the synthesis scale |
|---------|--------------------------------------------------------------------|
| CpG1MF1 | ATTTTTGGAAGAGAAATCGTTA                                             |
| CpG1MR1 | CGTCGTCTAACAACAATAATTTCC                                           |
| CpG1UF1 | ATTTTTGGAAGAGAAATTGT                                               |
| CpG1UR1 | AAAAAACCTACCTCATCATCT                                              |
| CpG2MF1 | TATATATTTTATGGAAGGCGGG                                             |
| CpG2MR1 | AACTAAATCCAATAATAATCGAAA                                           |
| CpG2UF1 | ATATATTTTATGGAAGGTGGG                                              |
| CpG2UR1 | ACTCTAAAACTAAATCCAATAATAATCA                                       |
| CpG3MF1 | TAATAAGGTAGGAGTTGGAGTATTCG                                         |
| CpG3MR1 | ATTTCTCAAAAATAAAAACAACGAAA                                         |
| CpG3UF1 | AATAAGGTAGGAGTTGGAGTATTT                                           |
| CpG3UR1 | ATTTCTCAAAAATAAAAACAACAAA                                          |
| CpG4MF1 | TGTTGTTGTATTAATTTTCGGAC                                            |
| CpG4MR1 | AATAAACTAAACCAAAAAAAAAACGAA                                        |
| CpG4UF1 | TGTTGTTGTATTAATTTTTGGATG                                           |
| CpG4UR1 | AATAAACTAAACCAAAAAAAAAACAAA                                        |
| CpG5MF1 | TTTCGTTTGTGTTTTTTTATTTGTC                                          |
| CpG5MR1 | AAAATATACCTCAAATCGATCGTT                                           |
| CpG5UF1 | TTTGTTTGTGTTTTTTTATTTGTTG                                          |
| CpG5UR1 | AAAATATACCTCAAATCAATCATT                                           |

**Supplementary table 3.** Viral parameters from HBV infected patient.

|                      | <b>Sample</b>   | <b>Patient 1</b> |
|----------------------|-----------------|------------------|
| <b>Biopsy tissue</b> | HBVtot/HBB      | 331.86           |
|                      | cccDNA/HBB      | 2.13             |
|                      | pgRNA/HBB       | 39.44            |
|                      | pgRNA/cccDNA    | 20.38            |
|                      | Origin          | blood donors     |
|                      | Clinical Status | LC               |
|                      | HBsAg           | 1                |
|                      | Age             | 23               |
|                      | Sex             | 1                |
|                      | UrbanRural      | R                |
|                      | District        | 31               |
|                      | OthersDistrict  | 1                |
|                      | Ethnic          | 1                |
|                      | PreS            | 0                |
| <b>Serum</b>         | ORF size        | 1200             |
|                      | AFB1 exposure   | 0                |
|                      | R249S TP53 AF   | 2.009646E-05     |
|                      | HBeAg           | 1                |
|                      | VL              | 288720           |
|                      | AST             | 45               |
|                      | ALT             | 45               |
|                      | Plats           | 217              |
|                      | SRATE           | 80               |
|                      | MSTIFF          | 10.2             |
| IQR                  | 1.4             |                  |
| IQRMED               | 14              |                  |
